# Supplementary material for: Fabrication of Porous Hydrophilic CN/PANI Heterojunction Film for High-Efficiency Photocatalytic H2 Evolution
Source: MDPI journal article supplement (doi:10.3390/catal13010139), 2023-01-06
Supplement: s1 [file s1]

## Supplementary Materials

# Fabrication of Porous Hydrophilic CN/PANI Heterojunction Film for High-efficiency Photocatalytic H<sub>2</sub> Evolution

Xiaohang Yang <sup>1,\*</sup>, Yulin Zhang <sup>2</sup>, Jiayuan Deng <sup>2</sup>, Xuyang Huo <sup>1</sup>, Yanling Wang <sup>1</sup> and Ruokun Jia <sup>2,\*</sup>

<sup>1</sup> Department of Biomedical Engineering, Jilin Medical University, Jilin 132013, China

<sup>2</sup> College of Chemical Engineering, Northeast Electric Power University, Jilin 132012, China

\* Correspondence: xhyang16@jlu.edu.com (X.Y.); jiaruokun@163.com (R.J.)

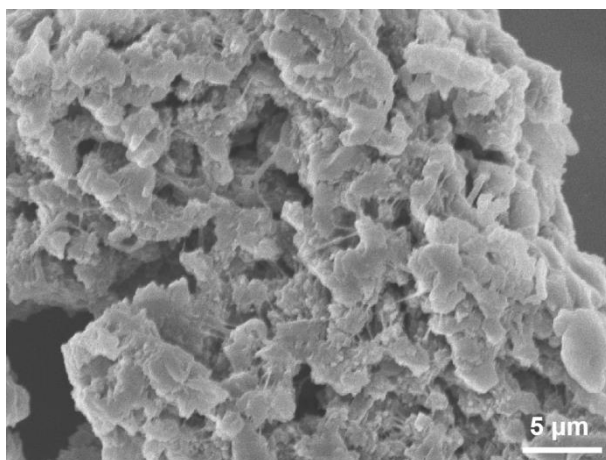

**Figure S1.** The SEM image of pristine CN/PANI heterojunction film.

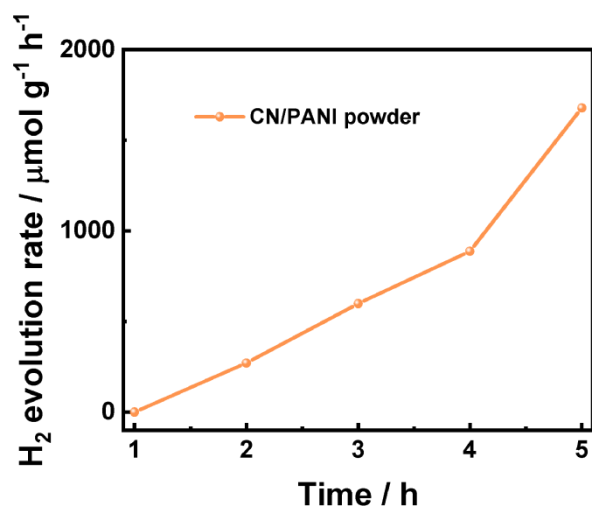

**Figure S2.** Photocatalytic H<sub>2</sub> evolution rate of the CN/PANI heterojunction powder.

**Table S1** Comparison in photocatalytic H<sub>2</sub> evolution activities of similar CN based heterojunctions.

| CN based heterojunctions                             | H <sub>2</sub> evolution rate<br>( $\mu\text{mol} \cdot \text{h}^{-1} \cdot \text{g}^{-1}$ ) | Ref.                |
|------------------------------------------------------|----------------------------------------------------------------------------------------------|---------------------|
| CN/PANI                                              | 163.2                                                                                        | Ref. 28 in the text |
| NiO/CN                                               | 165.9                                                                                        | Ref. 29 in the text |
| PAN/PANI/SrTiO <sub>3</sub>                          | 371                                                                                          | Ref. 30 in the text |
| CN/PANI/MoS <sub>2</sub>                             | 594                                                                                          | Ref. 31 in the text |
| TpPa-1-COF/CN                                        | 1153                                                                                         | Ref. 32 in the text |
| PANI/Ti-MOF/CoS                                      | 1322                                                                                         | Ref. 33 in the text |
| Porous hydrophilic<br>CN/PANI Heterojunction<br>film | 3164.3                                                                                       | This work           |

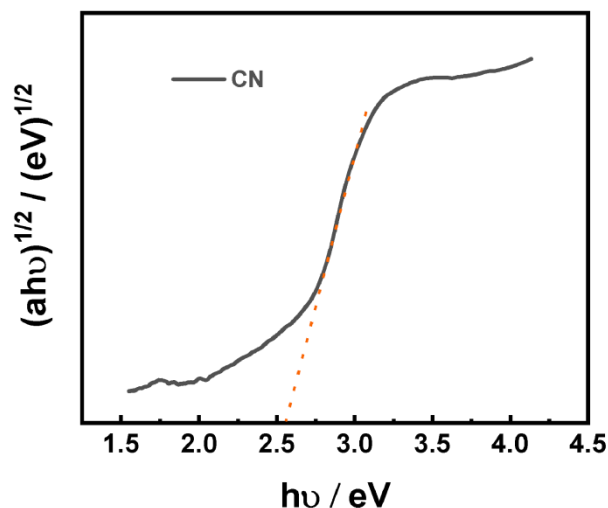

**Figure S3.** Tauc plot of pristine CN.

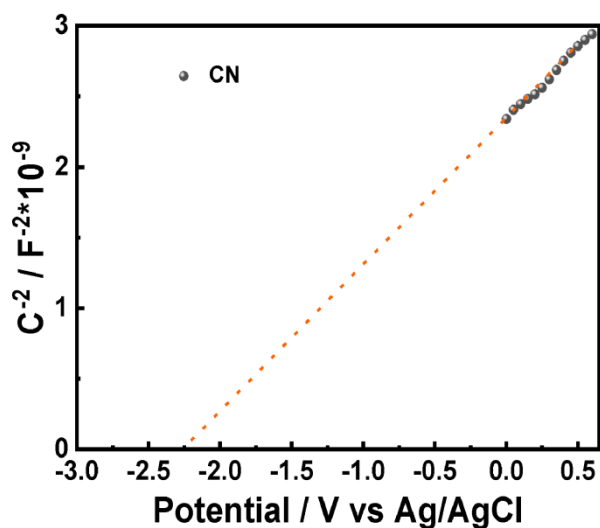

**Figure S4.** Mott-schottky plot of pristine CN.

The flat band potentials ( $E_{fb}$ ) of CN photocatalyst estimated from the X intercept at the tangents of Mott-Schottky plot was -2.25 V vs Ag/AgCl. Thus, the  $E_{fb}$  (vs NHE, pH=0) potentials of CN was -1.5 V. The positive slope of Mott-Schottky plot confirmed the n-type semiconductor of CN, whose  $E_{fb}$  was generally 0.3 V below conduction band minimum (CBM). Hence, the CBM potential of CN was calculated to be -1.8 V and the valence band minimum (VBM) potential of the CN was 0.79 V according to the  $E_g$  value obtained from the Tauc plots (Figure S2).
